# Supplementary material for: The sphingosine 1-phosphate receptor 2 is shed in exosomes from breast cancer cells and is N-terminally processed to a short constitutively active form that promotes extracellular signal regulated kinase activation and DNA synthesis in fibroblasts
Source: PubMed Central journal article supplement (PMC6047680; doi:10.18632/oncotarget.25658), 2018-06-29
Supplement: oncotarget-09-29453-s001.pdf [file oncotarget-09-29453-s001.pdf]

**The sphingosine 1-phosphate receptor 2 is shed in exosomes from breast cancer cells and is N-terminally processed to a short constitutively active form that promotes extracellular signal regulated kinase activation and DNA synthesis in fibroblasts**

**SUPPLEMENTARY MATERIALS**

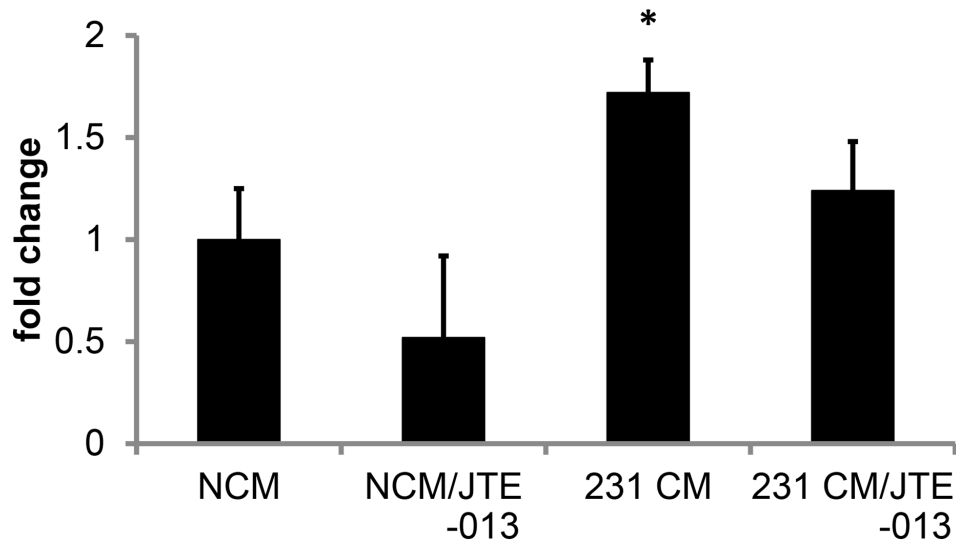

**Supplementary Figure 1: Effect of CM from MDA-MB-231 cells on phosphorylated ERK-1/2 levels in MEFs.** Bar graph showing the effect of NCM and CM on ERK-1/2 phosphorylation in MEFs treated with vehicle (DMSO, 0.1% v/v) or JTE-013 (10  $\mu$ M). Data are expressed as the fold change in the P-ERK-1/2: actin ratio and are means  $\pm$  SD for n=3 experiments. \* p values < 0.05 for CM versus NCM.

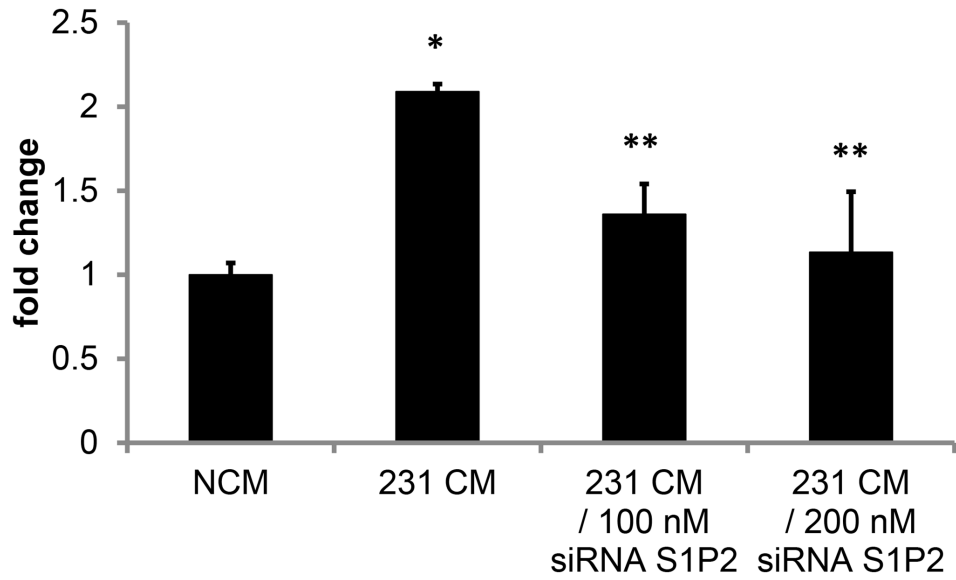

**Supplementary Figure 2: Specificity for ERK-1/2 activation in MEFs for S1P<sub>2</sub> in CM from MDA-MB-231 cells.** Effect of CM isolated from MDA-MB-231 in which S1P<sub>2</sub> is knocked down with siRNA (100 and 200 nM) on phosphorylated ERK-1/2 levels in MEFs. Data are expressed as the fold change in the P-ERK-1/2: actin ratio and are means +/- SD for n=3 experiments. \* p values < 0.05 for CM versus NCM and \*\* p < 0.05 for siRNA/CM *versus* scrambled/CM.

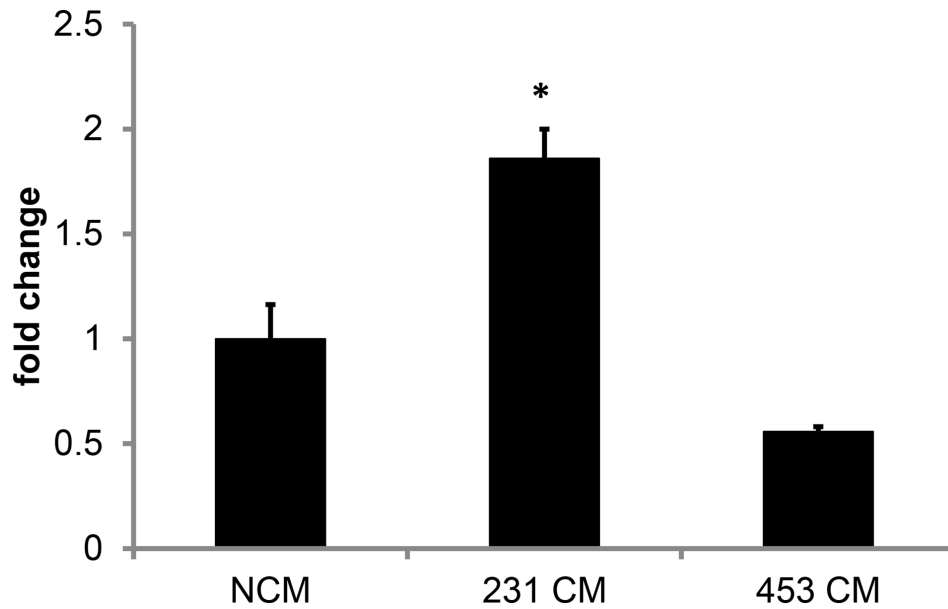

**Supplementary Figure 3: Effect of CM from MDA-MB-231 and MDA-MB-453 cells on phosphorylated ERK-1/2 levels in MEFs.** Bar graph showing the effect of CM containing either S1P<sub>2</sub> or S1P<sub>4</sub> from MDA-MD-231 and MDA-MB-453 cells respectively on ERK-1/2 phosphorylation in MEFs. Data are expressed as the fold change in the P-ERK-1/2: actin ratio and are means +/- SD for n=3 experiments. \* p values < 0.05 for 231 CM *versus* NCM.

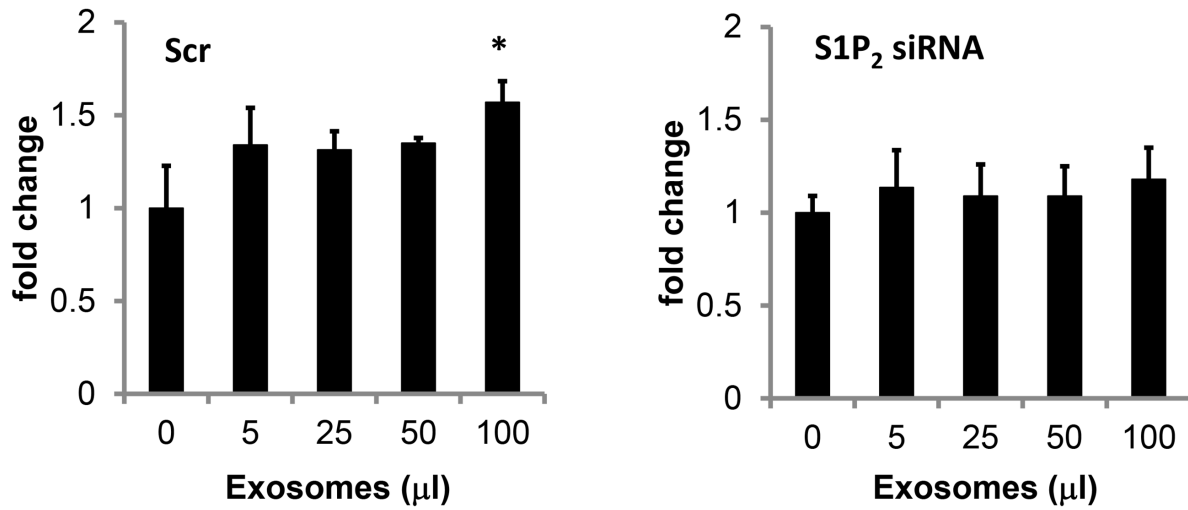

**Supplementary Figure 4: Effect of exosomes containing S1P<sub>2</sub> from MDA-MB-231 on phosphorylated ERK-1/2 levels in MEFs.** Bar graph showing the effect of exosomes isolated from scrambled or S1P<sub>2</sub> siRNA-treated MDA-MB 231 cells on ERK-1/2 phosphorylation in MEFs. Data are expressed as the fold change in the P-ERK-1/2: actin ratio and are means +/- SD for n=3 experiments. \* p values < 0.05 for Exo versus PBS.
